# Supplementary material for: Isoalantolactone Enhances the Antitumor Activity of Doxorubicin by Inducing Reactive Oxygen Species and DNA Damage
Source: PubMed Central journal article supplement (PMC8821528; doi:10.3389/fonc.2022.813854), 2022-01-25
Supplement: DataSheet_1.pdf [file DataSheet_1.pdf]

## Supplementary data

Figure S1

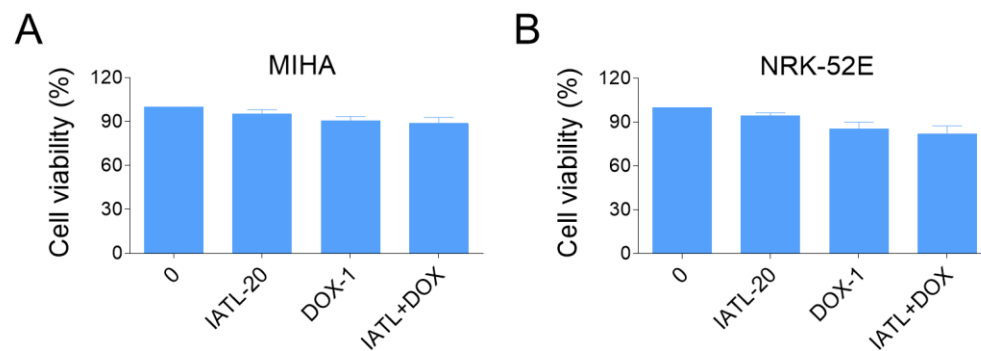

**Figure S1.** (A-B) Cell viability was measured after treated with IATL or DOX alone or their combination (20  $\mu$ M IATL and 1  $\mu$ M DOX) for 24 h.

Figure S2

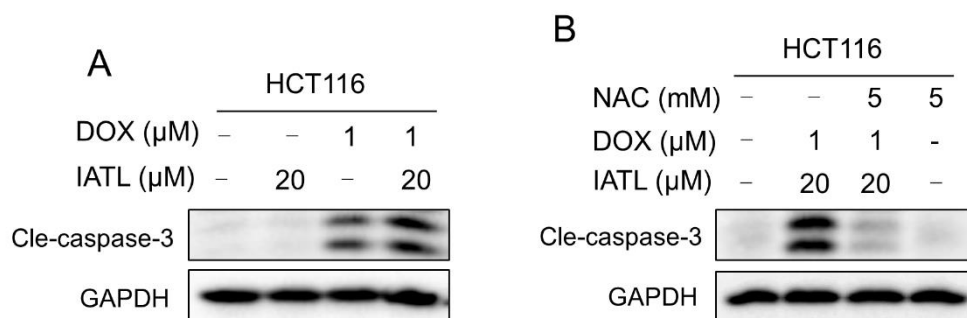

**Figure S2.** (A) HCT116 cells were treated with IATL or DOX alone or their combination for 20 h, the expression of cle-caspase-3 and GAPDH were examined by western blot analysis. (B) HCT116 cells were pretreated with NAC (5 mM) for 1 h and cell lysates were blotted with the indicated antibodies after treated with IATL and DOX combination for 20 h.
